# Supplementary material
Source: PubMed Central journal article supplement (PMC3266545)

# Supplemental Figure S1

**A**

**WT**

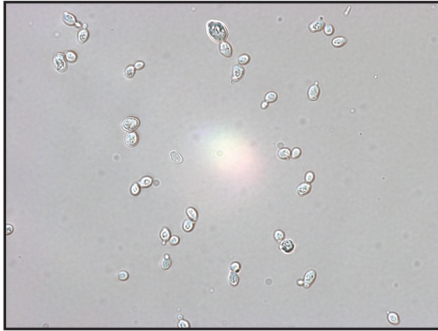

**fkh1Δ**

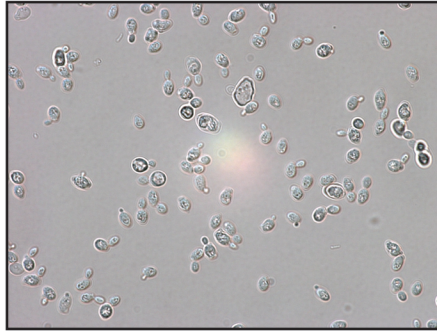

**fkh2Δ**

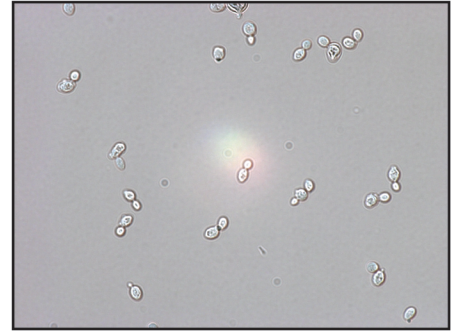

**fkh1Δfkh2Δ**

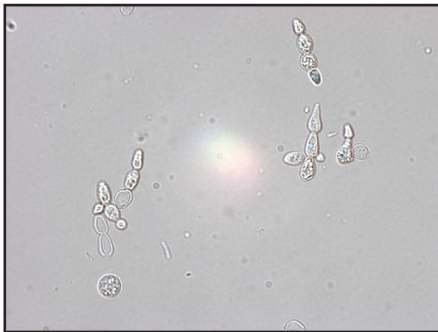

**fkh1Δfkh2Δ+pfkh2ΔC**

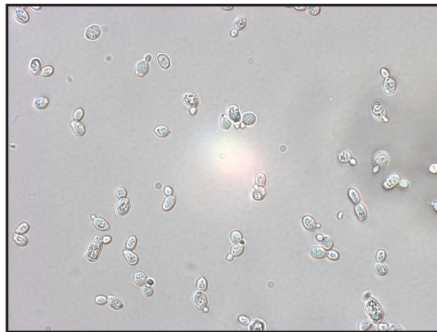

**B**

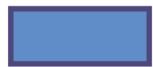

**fkh1Δ**

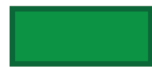

**fkh1Δ fkh2Δ**

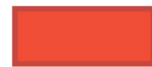

**fkh1Δ fkh2Δ+pfkh2ΔC**

**Fkh-activated**

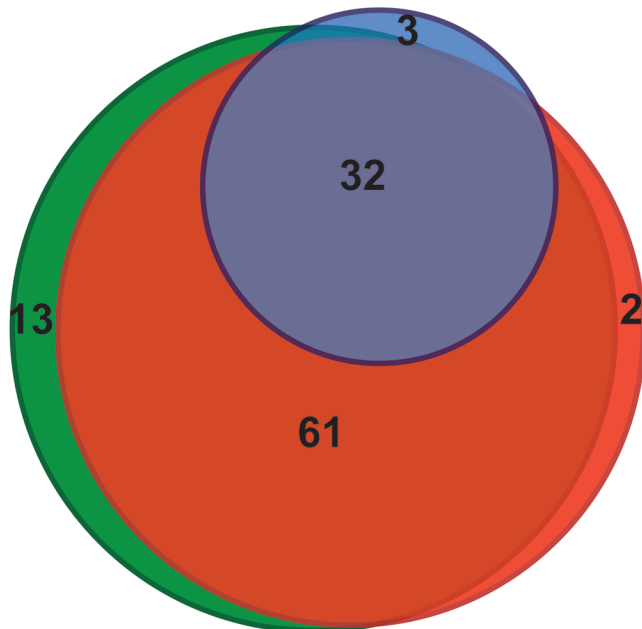

**Fkh-repressed**

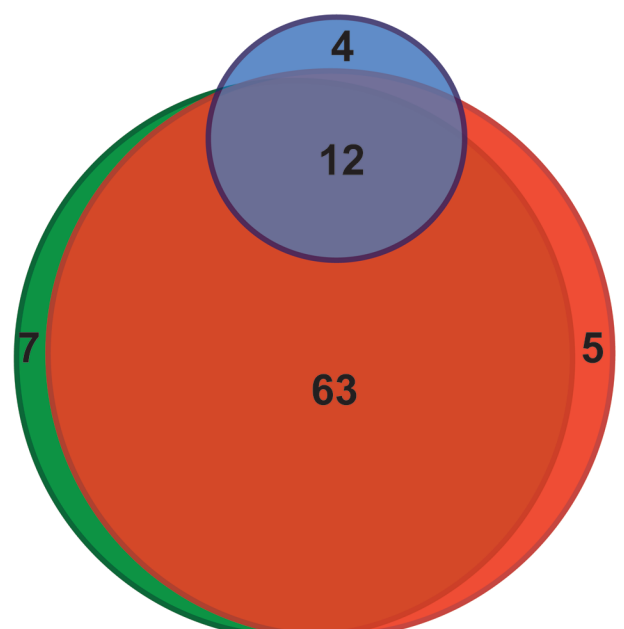

Supplement: NIHMS345626-supplement-03.pdf [file NIHMS345626-supplement-03.pdf]
