# Supplementary material
Source: PubMed Central journal article supplement (PMC3266545)

# Supplemental Figure S2

A

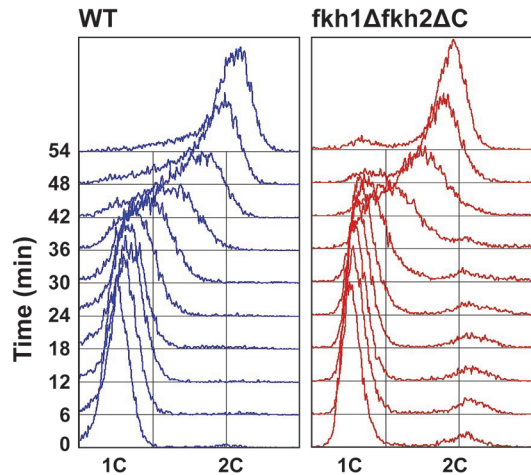

B

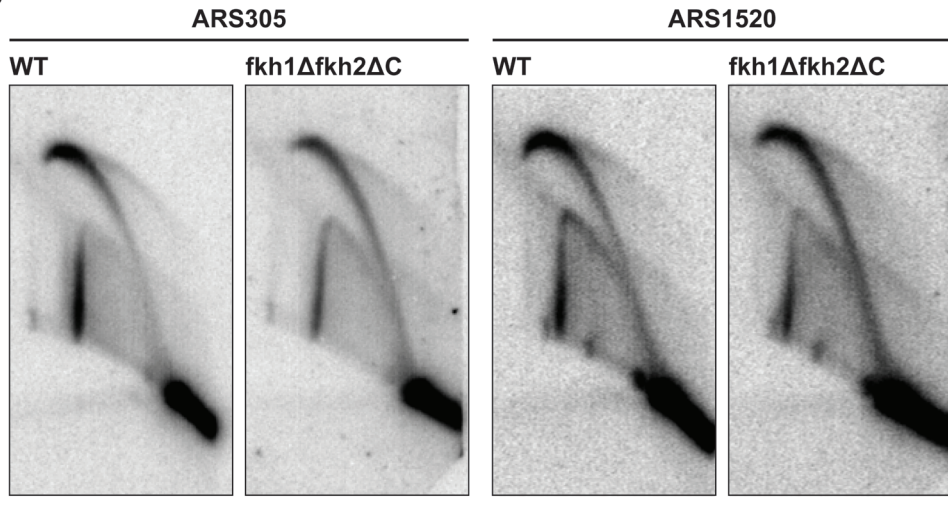

Supplement: NIHMS345626-supplement-04.pdf [file NIHMS345626-supplement-04.pdf]

# Supplemental Figure S3

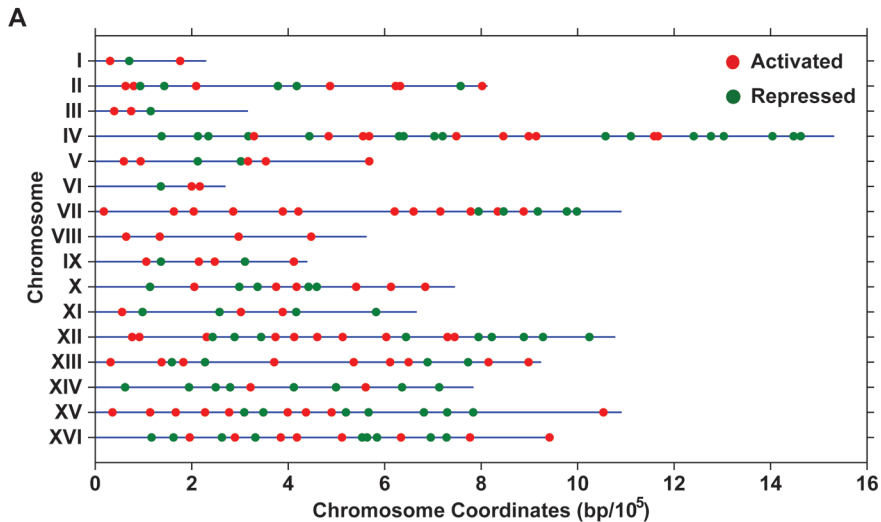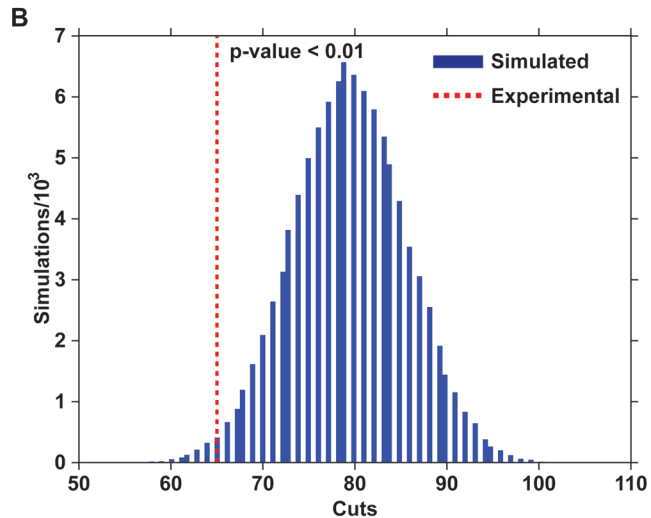

Supplement: NIHMS345626-supplement-05.pdf [file NIHMS345626-supplement-05.pdf]

# Supplemental Figure S4

**A**

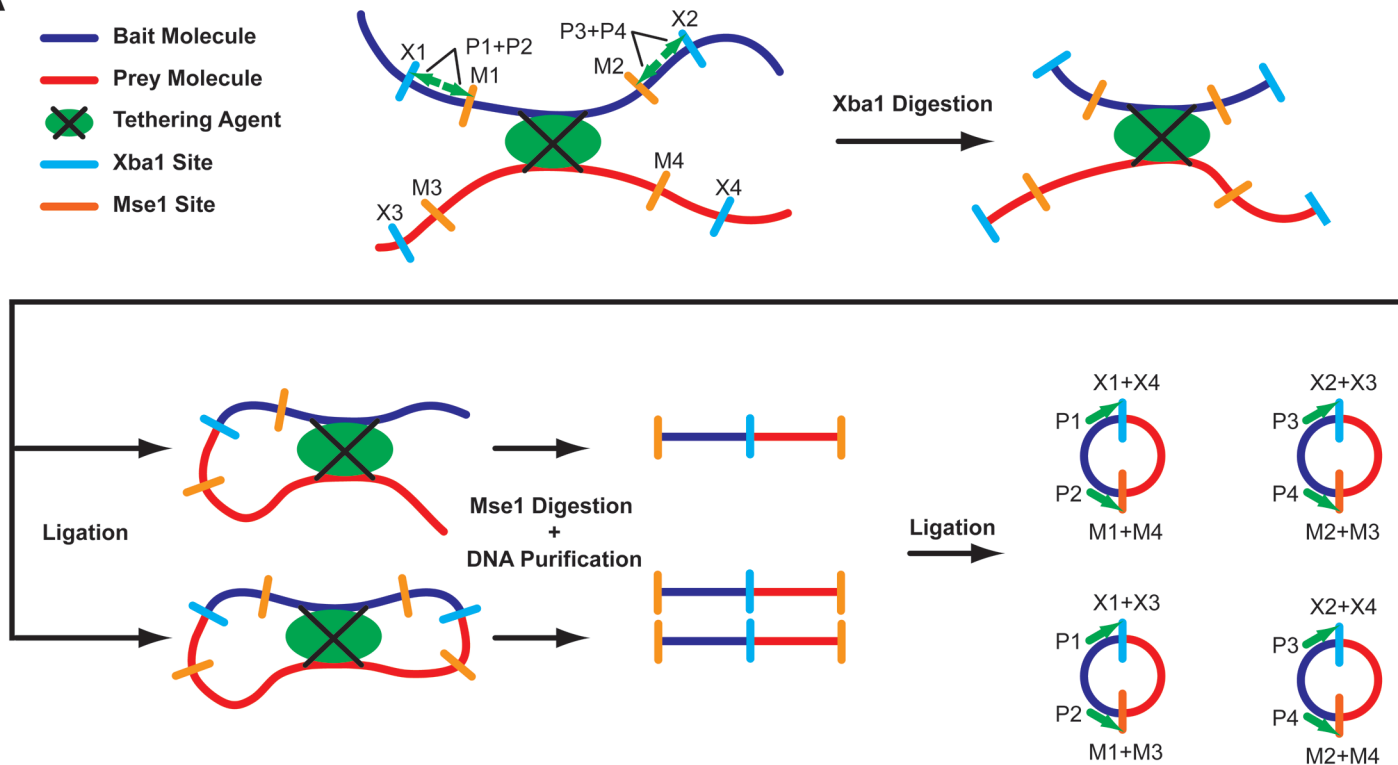

**B**

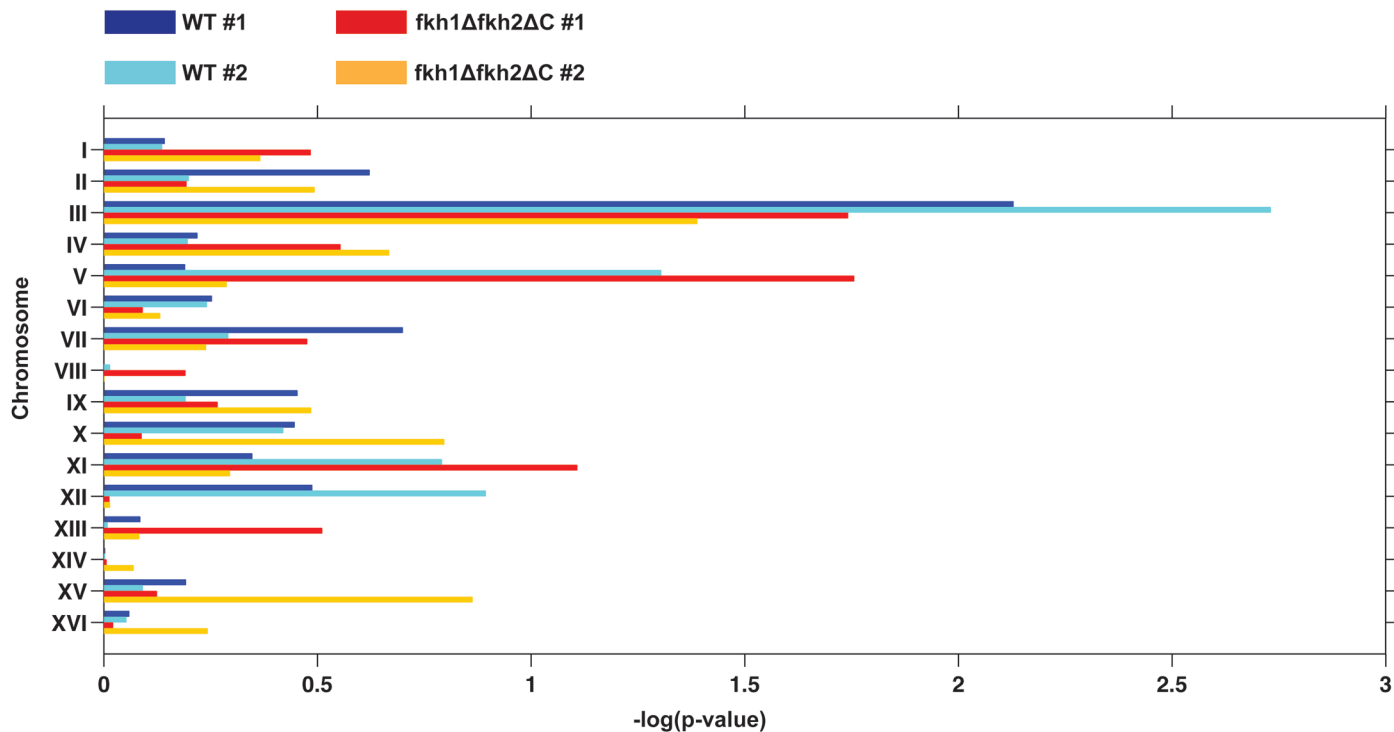

Supplement: NIHMS345626-supplement-06.pdf [file NIHMS345626-supplement-06.pdf]
